# Supplementary material for: Development of Antimicrobial Stapled Peptides Based on Magainin 2 Sequence
Source: PubMed Central journal article supplement (PMC7830303; doi:10.3390/molecules26020444), 2021-01-16
Supplement: molecules-26-00444-s001.pdf [file molecules-26-00444-s001.pdf]

# Development of Antimicrobial Stapled Peptides Based on Magainin 2 Sequence

Motoharu Hirano,<sup>1,2</sup> Chihiro Saito,<sup>3</sup> Hidetomo Yokoo,<sup>1</sup> Chihiro Goto,<sup>1,2</sup> Ryuji Kawano,<sup>3</sup>  
Takashi Misawa,<sup>1, \*</sup> Yosuke Demizu<sup>1,2,\*</sup>

<sup>1</sup> National Institute of Health Sciences, 3-25-26, Tonomachi, Kawasaki, Kanagawa 210-9501, Japan

<sup>2</sup> Graduate School of medical Life Science, Yokohama City University, 1-7-29, Yokohama, Kanagawa 230-0045, Japan

<sup>3</sup> Department of Biotechnology and Life Science, Tokyo University of Agriculture and Technology, 2-24-6 Naka-cho, Koganei, Tokyo 184-8588, Japan

\* Correspondence: demizu@nihs.go.jp (Y.D.); misawa@nihs.go.jp (T.M.); Tel.:+81-44-270-6578

**Table of Contents**

|                                                              |    |
|--------------------------------------------------------------|----|
| Figure S1 CD spectra analysis of <i>N</i> -acylated peptides | S3 |
| ESI-TOF-MS and HPLC data of the synthesized peptides         | S4 |

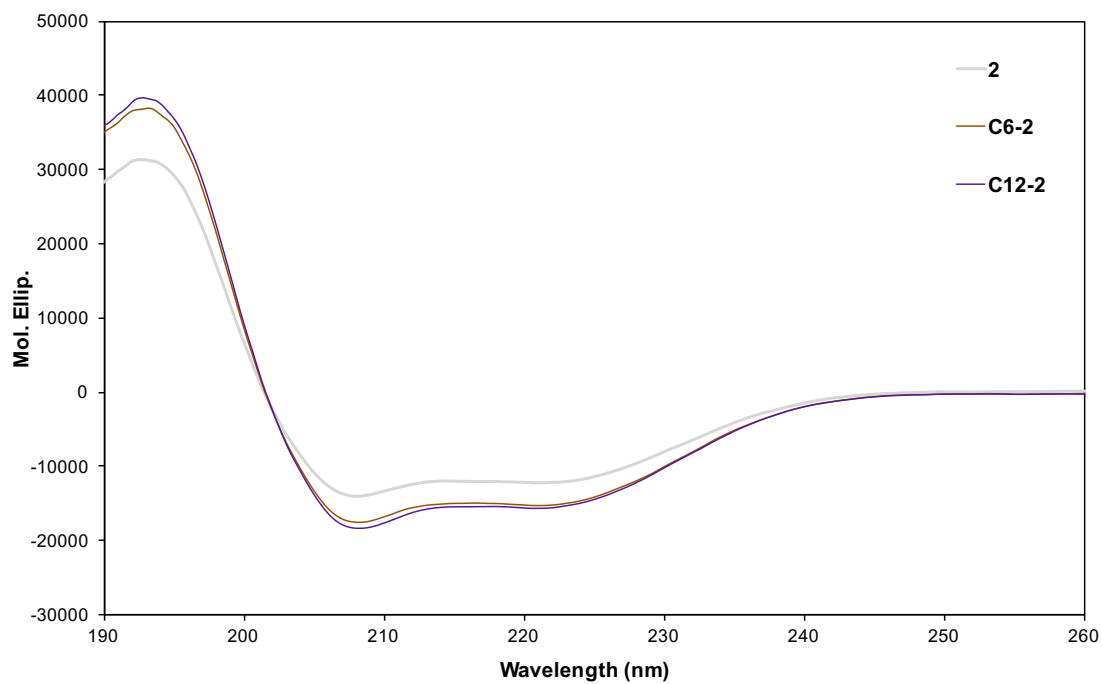

**Figure S1.** Preferred secondary structure of peptide **2**, **C6-2**, and **C12-2** in pH = 7.4 PBS solution with 1% SDS. Peptide concentration = 100  $\mu$ M.

## Mag2

H-Gly-Ile-Gly-Lys-Phe-Leu-His-Ser-Ala-Lys-Lys-Phe-Gly-Lys-Ala-Phe-Val-Gly-Glu-Ile-Met-Asn-Ser-NH<sub>2</sub>

HPLC: Conditions = solvent A 0.1% TFA/water, solvent B 0.1% TFA/CH<sub>3</sub>CN

Gradient = 10-90% gradient of solvent B over 30 min

Purity: 99.7%

HRMS (ESI<sup>+</sup>) calcd for C<sub>114</sub>H<sub>181</sub>N<sub>31</sub>O<sub>28</sub>S [M+4H]<sup>4+</sup>: 617.0933; found: 617.0840

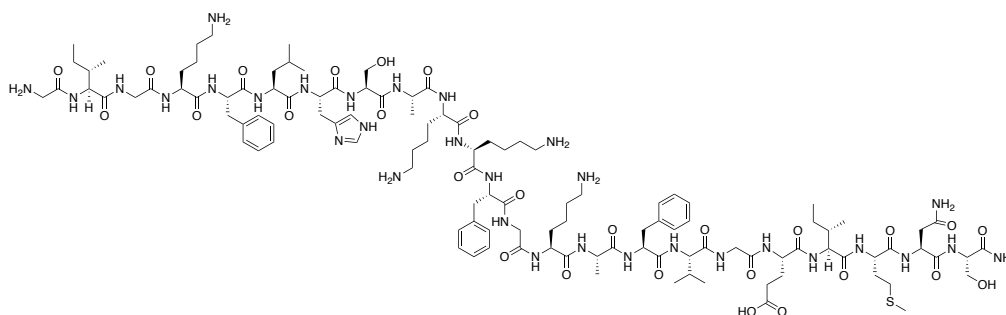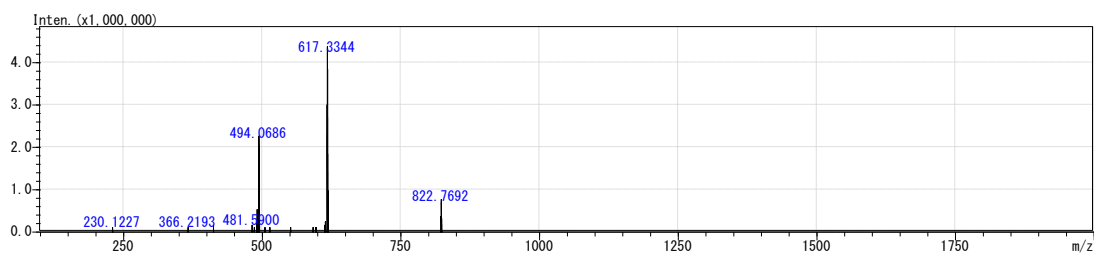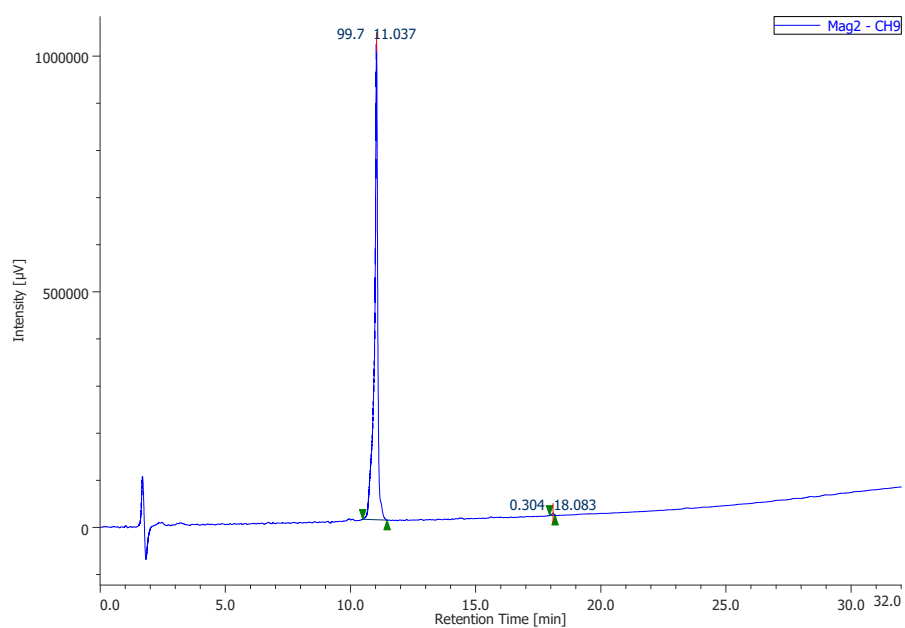

## Peptide 1

H-Gly-Ile-Lys-Lys-Phe-Leu-Lys-Ser-Aib-Lys-Lys-Phe-Val-Lys-Aib-Phe-Lys-NH<sub>2</sub>

HPLC: Conditions = solvent A 0.1% TFA/water, solvent B 0.1% TFA/CH<sub>3</sub>CN

Gradient = 10-90% gradient of solvent B over 30 min

Purity: 96.4%

HRMS (ESI<sup>+</sup>) calcd for C<sub>99</sub>H<sub>167</sub>N<sub>25</sub>O<sub>18</sub> [M+5H]<sup>5+</sup>: 399.8662; found: 399.8595

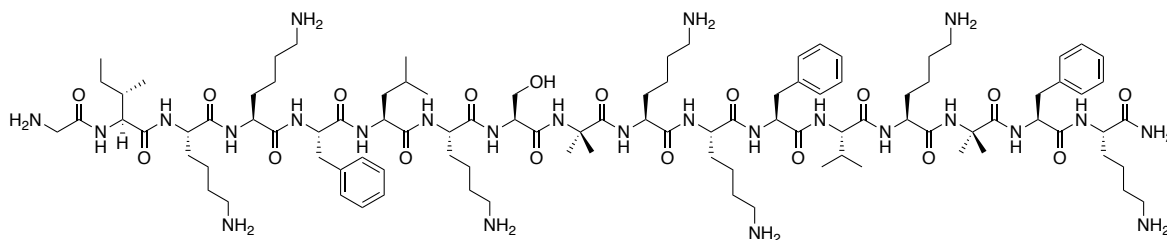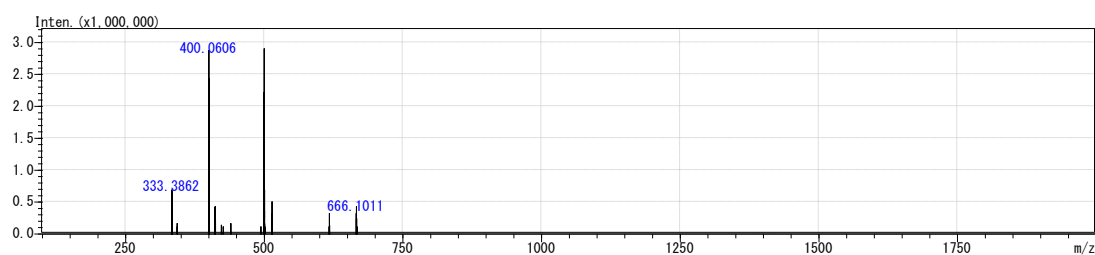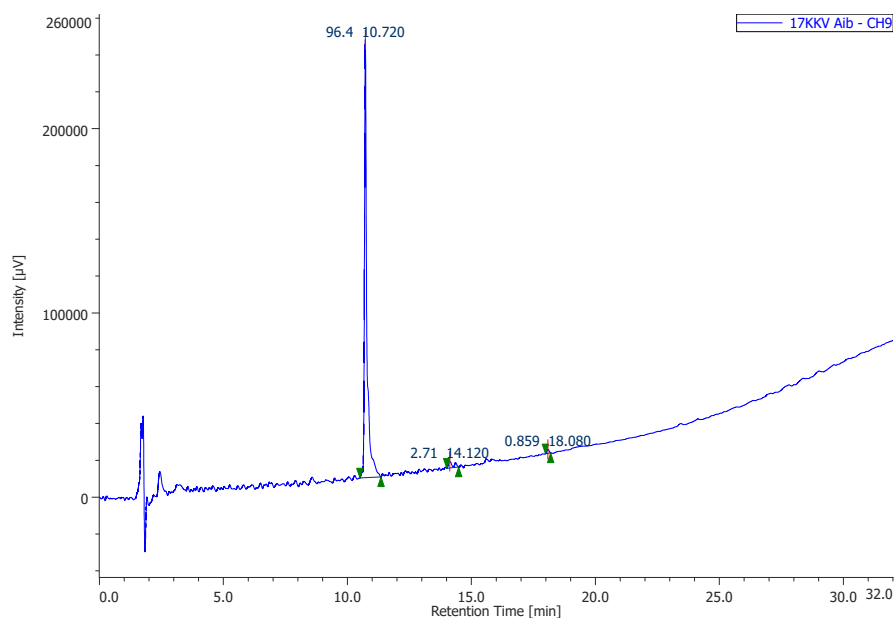

## Peptide 2

H-S<sub>3</sub>-Ile-Lys-Lys-S<sub>3</sub>-Leu-Lys-Ser-Ala-Lys-Lys-Phe-Val-Lys-Ala-Phe-Lys-NH<sub>2</sub>

HPLC: Conditions = solvent A 0.1% TFA/water, solvent B 0.1% TFA/CH<sub>3</sub>CN

Gradient = 10-90% gradient of solvent B over 30 min

Purity: 95.0%

HRMS (ESI<sup>+</sup>) calcd for C<sub>100</sub>H<sub>173</sub>N<sub>25</sub>O<sub>18</sub> [M+5H]<sup>5+</sup>: 403.4756; found: 403.4797

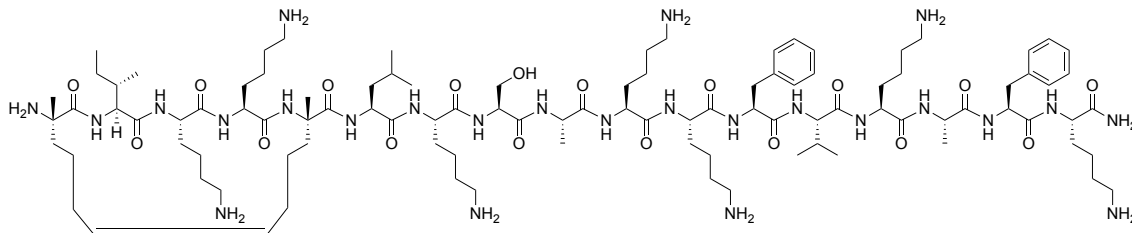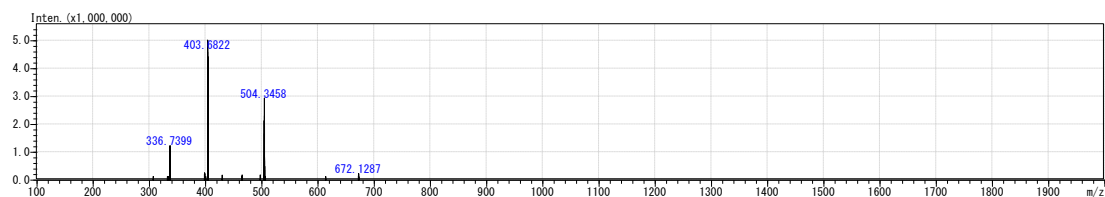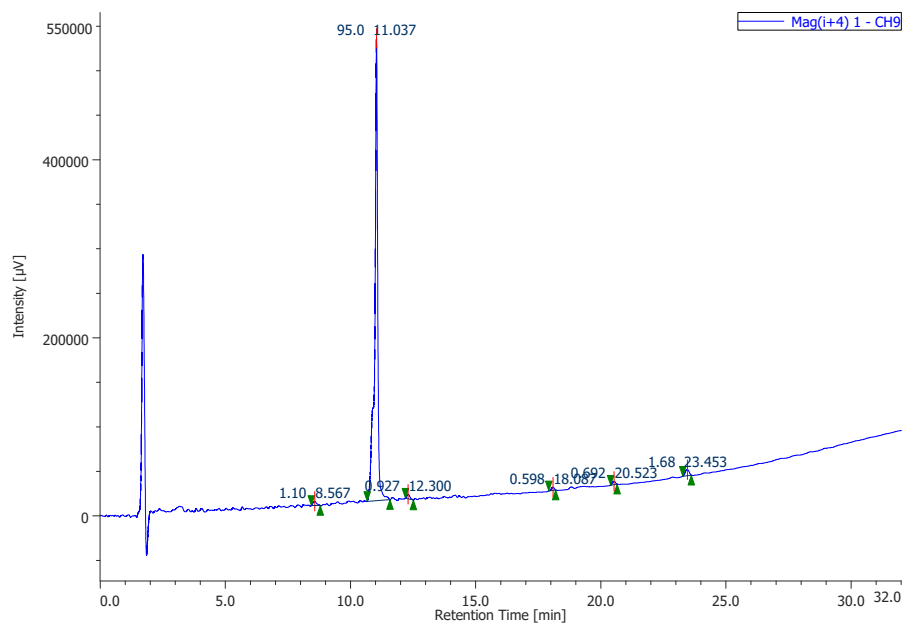

### Peptide 3

H-Gly-Ile-Lys-Lys-S<sub>5</sub>-Leu-Lys-Ser-S<sub>5</sub>-Lys-Lys-Phe-Val-Lys-Ala-Phe-Lys-NH<sub>2</sub>

HPLC: Conditions = solvent A 0.1% TFA/water, solvent B 0.1% TFA/CH<sub>3</sub>CN

Gradient = 10-90% gradient of solvent B over 30 min

Purity: 96.2%

HRMS (ESI<sup>+</sup>) calcd for C<sub>99</sub>H<sub>171</sub>N<sub>25</sub>O<sub>18</sub> [M+5H]<sup>5+</sup>: 400.6725; found: 400.6795

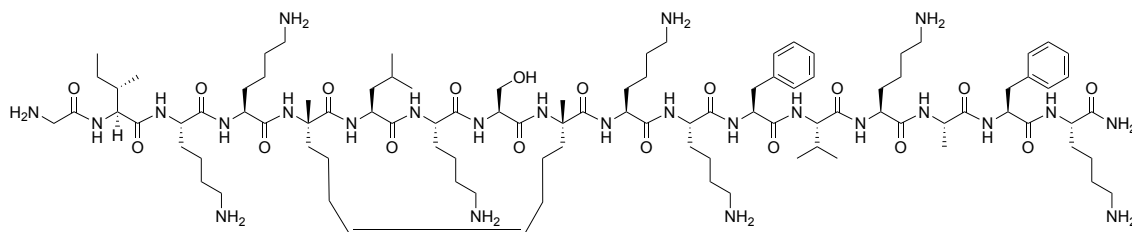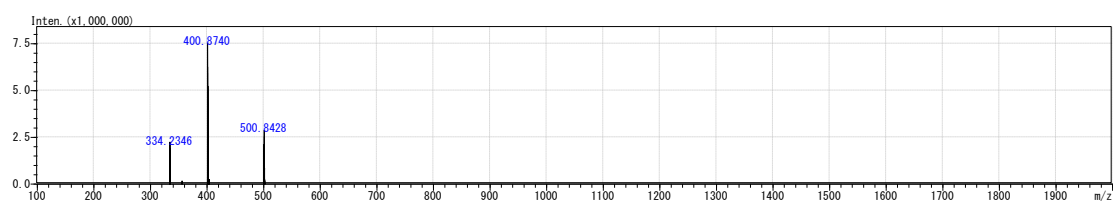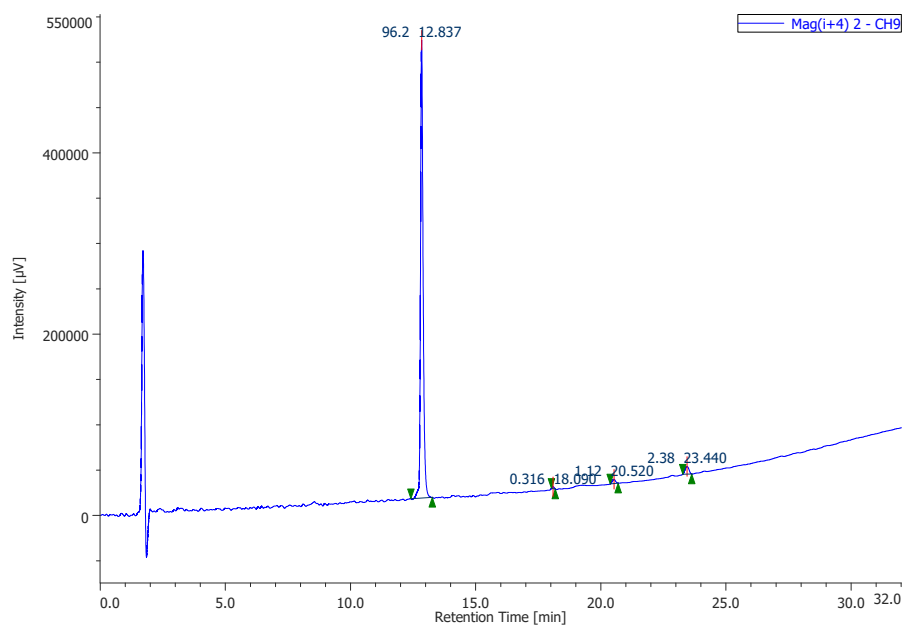

Peptide **4** (E/Z isomers were detected)

H-Gly-Ile-Lys-Lys-Phe-Leu-Lys-S<sub>ε</sub>-Ala-Lys-Lys-S<sub>ε</sub>-Val-Lys-Ala-Phe-Lys-NH<sub>2</sub>

HPLC: Conditions = solvent A 0.1% TFA/water, solvent B 0.1% TFA/CH<sub>3</sub>CN

Gradient = 10-90% gradient of solvent B over 30 min

Purity: 99.3%

HRMS (ESI<sup>+</sup>) calcd for C<sub>99</sub>H<sub>171</sub>N<sub>25</sub>O<sub>17</sub> [M+5H]<sup>5+</sup>: 397.4735; found: 397.4748

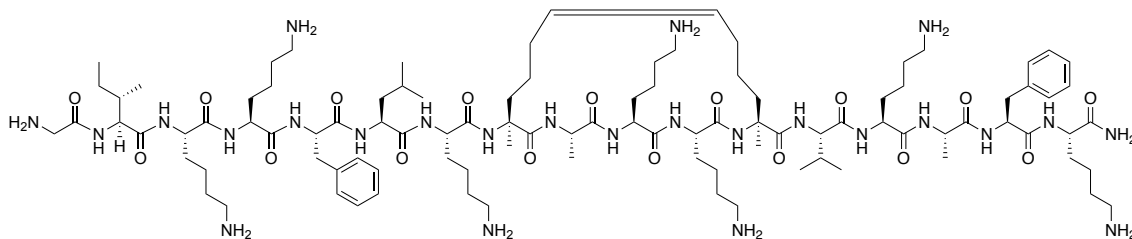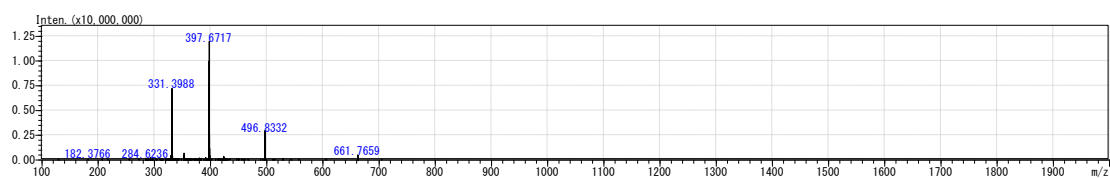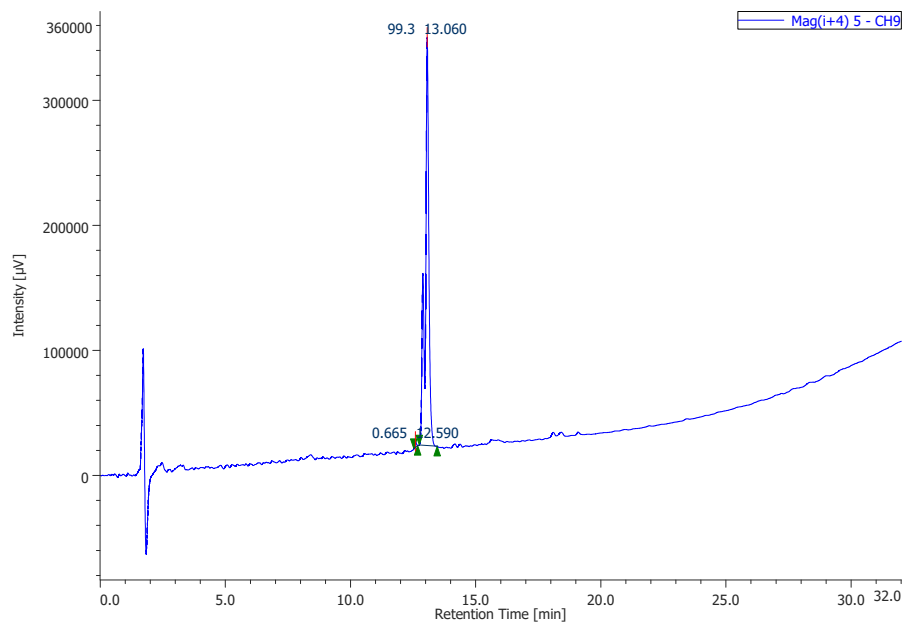



## Peptide 5

H-Gly-Ile-Lys-Lys-Phe-Leu-Lys-Ser-S<sub>3</sub>-Lys-Lys-Phe-S<sub>3</sub>-Lys-Ala-Phe-Lys-NH<sub>2</sub>

HPLC: Conditions = solvent A 0.1% TFA/water, solvent B 0.1% TFA/CH<sub>3</sub>CN

Gradient = 10-90% gradient of solvent B over 30 min

Purity: 99.8%

HRMS (ESI<sup>+</sup>) calcd for C<sub>103</sub>H<sub>171</sub>N<sub>25</sub>O<sub>18</sub> [M+4H]<sup>4+</sup>: 512.5887; found: 512.5864

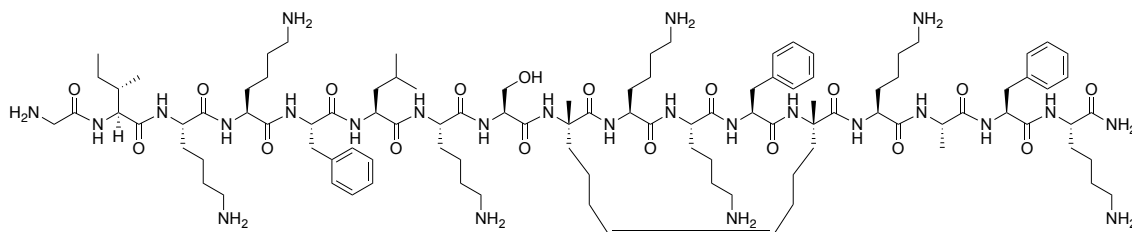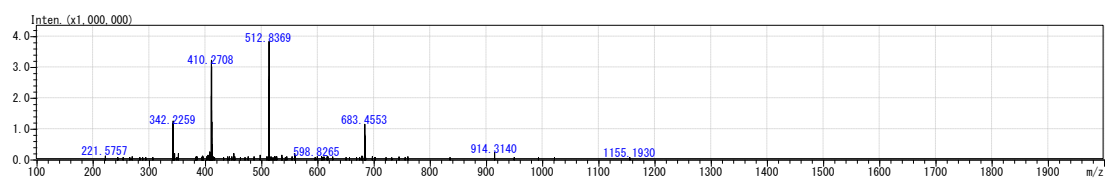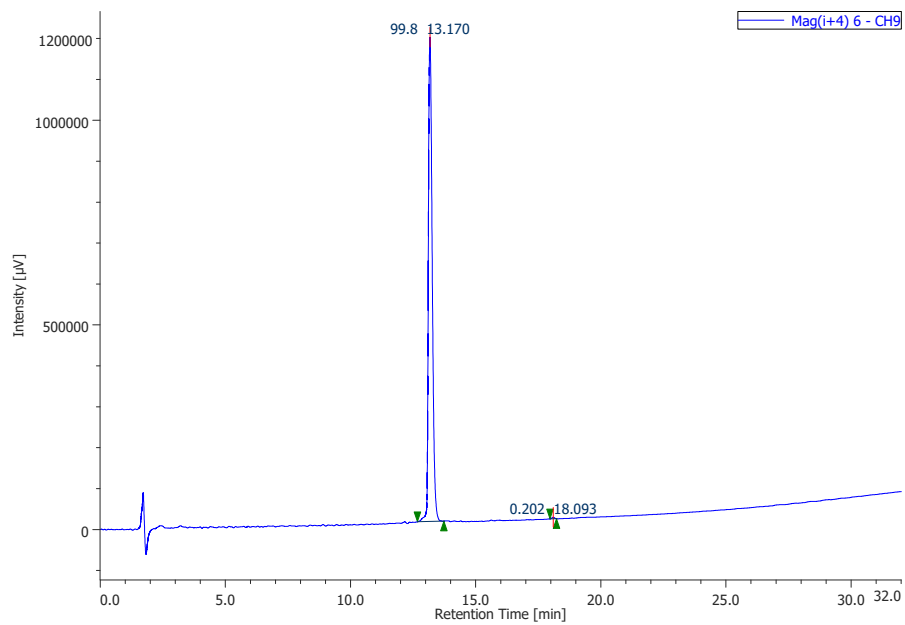

## Peptide 6

H-Gly-Ile-Lys-Lys-Phe-Leu-Lys-Ser-Ala-Lys-Lys-S<sub>5</sub>-Val-Lys-Ala-S<sub>5</sub>-Lys-NH<sub>2</sub>

HPLC: Conditions = solvent A 0.1% TFA/water, solvent B 0.1% TFA/CH<sub>3</sub>CN

Gradient = 10-90% gradient of solvent B over 30 min

Purity: 98.5%

HRMS (ESI<sup>+</sup>) calcd for C<sub>93</sub>H<sub>167</sub>N<sub>25</sub>O<sub>18</sub> [M+5H]<sup>5+</sup>: 385.4662; found: 385.4703

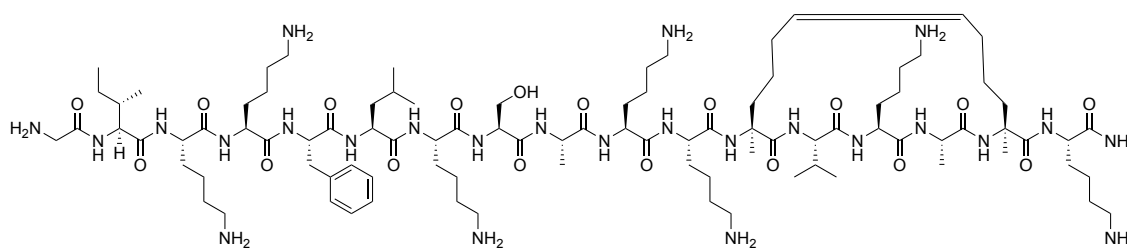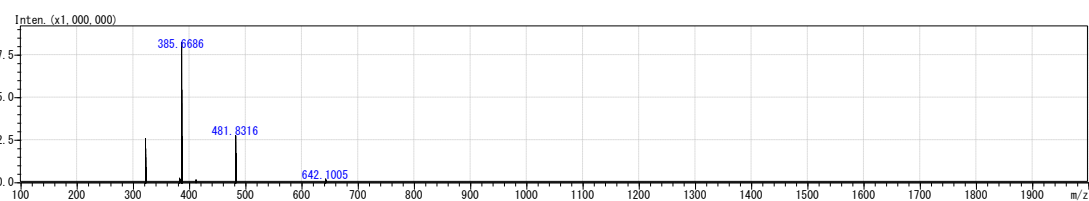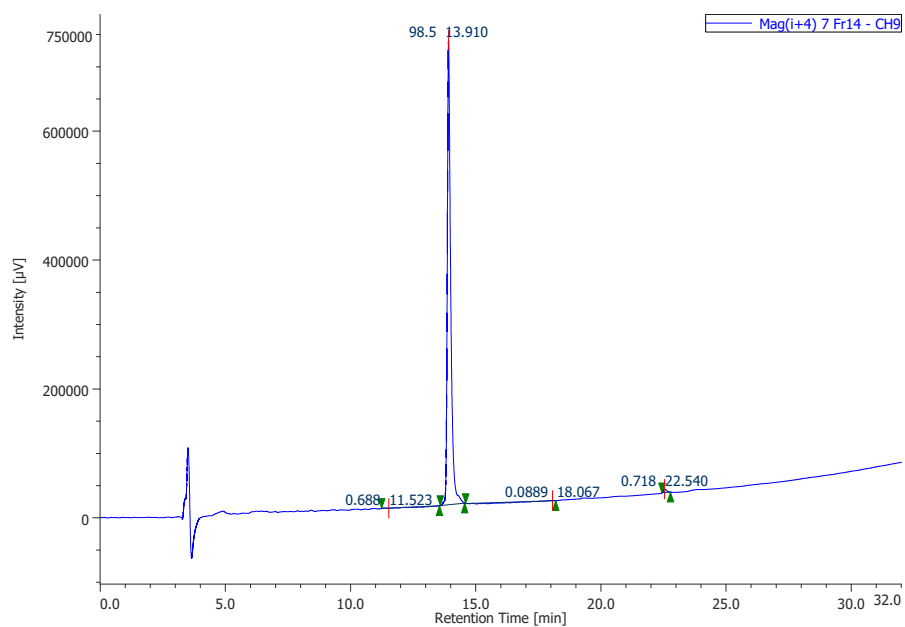



## Peptide 8

H-Gly-Ile-Lys-Lys-Phe-Leu-Lys-R<sub>s</sub>-Ala-Lys-Lys-Phe-Val-Lys-S<sub>5</sub>-Phe-Lys-NH<sub>2</sub>

HPLC: Conditions = solvent A 0.1% TFA/water, solvent B 0.1% TFA/CH<sub>3</sub>CN

Gradient = 10-90% gradient of solvent B over 30 min

Purity: 99.6%

HRMS (ESI<sup>+</sup>) calcd for C<sub>108</sub>H<sub>181</sub>N<sub>25</sub>O<sub>17</sub> [M+5H]<sup>5+</sup>: 421.0892; found: 421.0873

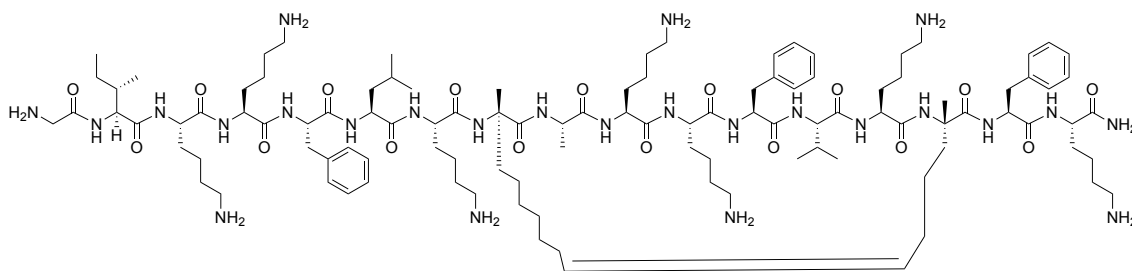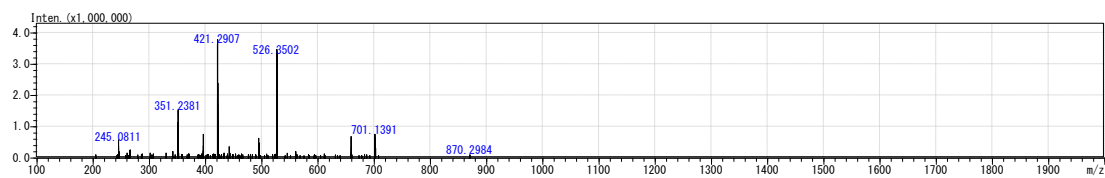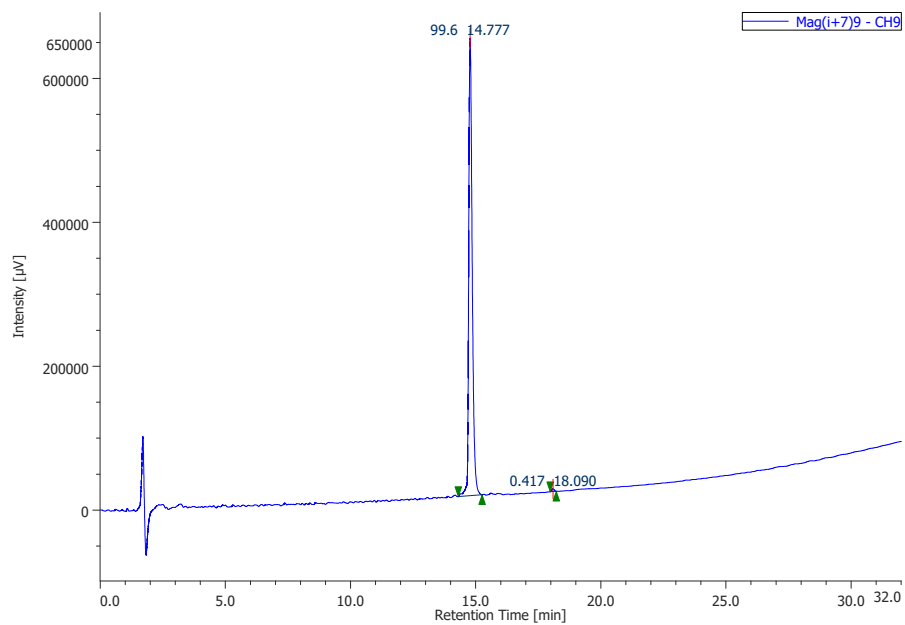

## Peptide 9

H-Gly-Ile-Lys-Lys-Phe-Leu-Lys-Ser-R<sub>s</sub>-Lys-Lys-Phe-Val-Lys-Ala-S<sub>5</sub>-Lys-NH<sub>2</sub>

HPLC: Conditions = solvent A 0.1% TFA/water, solvent B 0.1% TFA/CH<sub>3</sub>CN

Gradient = 10-90% gradient of solvent B over 30 min

Purity: 98.8%

HRMS (ESI<sup>+</sup>) calcd for C<sub>102</sub>H<sub>177</sub>N<sub>25</sub>O<sub>18</sub> [M+3H]<sup>3+</sup>: 681.1313; found: 681.1311

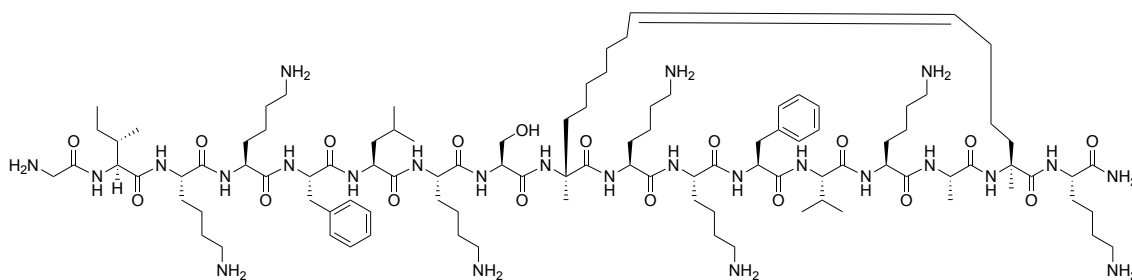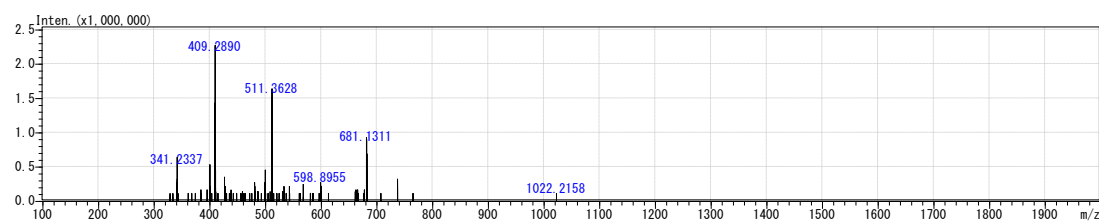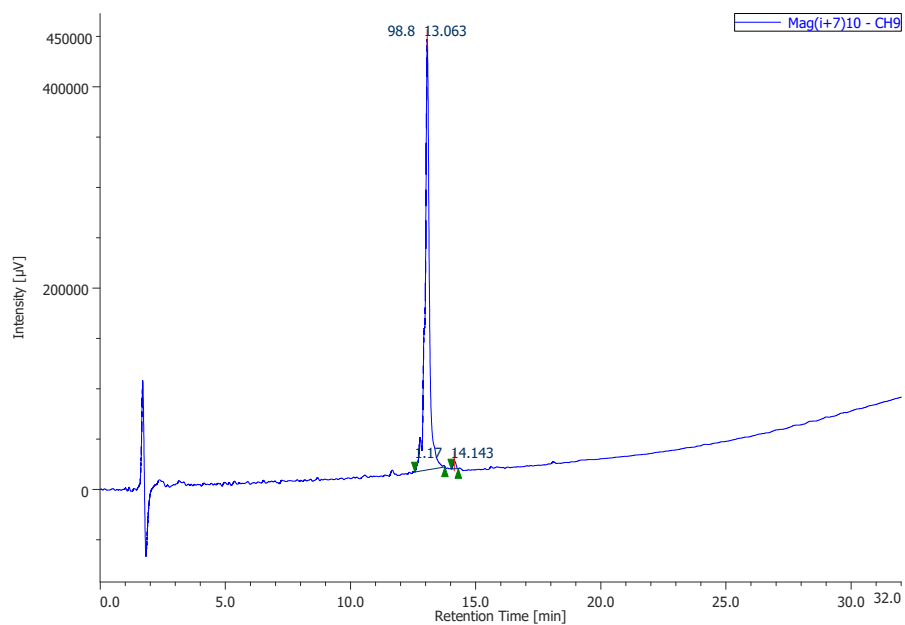

**C6-2** (E/Z isomers were detected)

$\text{CH}_3(\text{CH}_2)_4\text{CO-S}_5\text{-Ile-Lys-Lys-S}_5\text{-Leu-Lys-Ser-Ala-Lys-Lys-Phe-Val-Lys-Ala-Phe-Lys-NH}_2$

HPLC: Conditions = solvent A 0.1% TFA/water, solvent B 0.1% TFA/ $\text{CH}_3\text{CN}$

Gradient = 10-90% gradient of solvent B over 30 min

Purity: 95.2%

HRMS (ESI<sup>+</sup>) calcd for  $\text{C}_{106}\text{H}_{183}\text{N}_{25}\text{O}_{19}$   $[\text{M}+5\text{H}]^{5+}$ : 423.0902; found: 423.0912

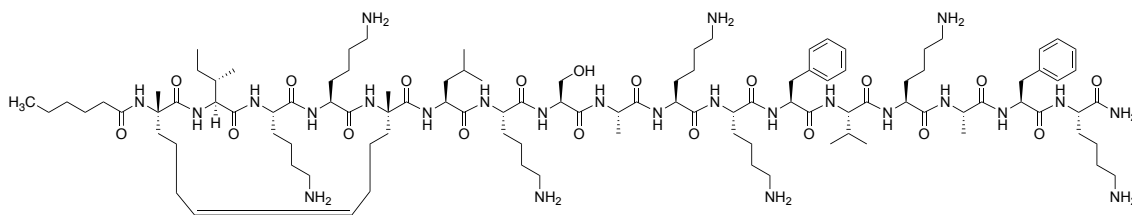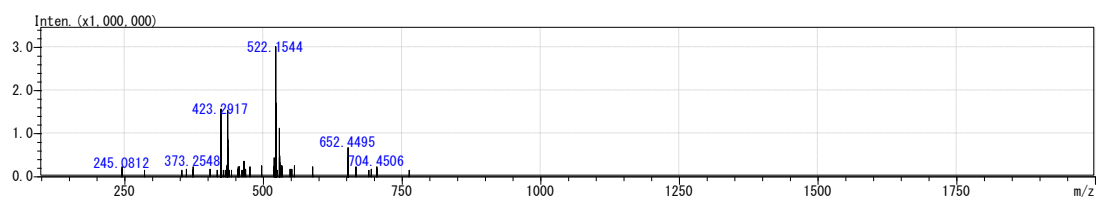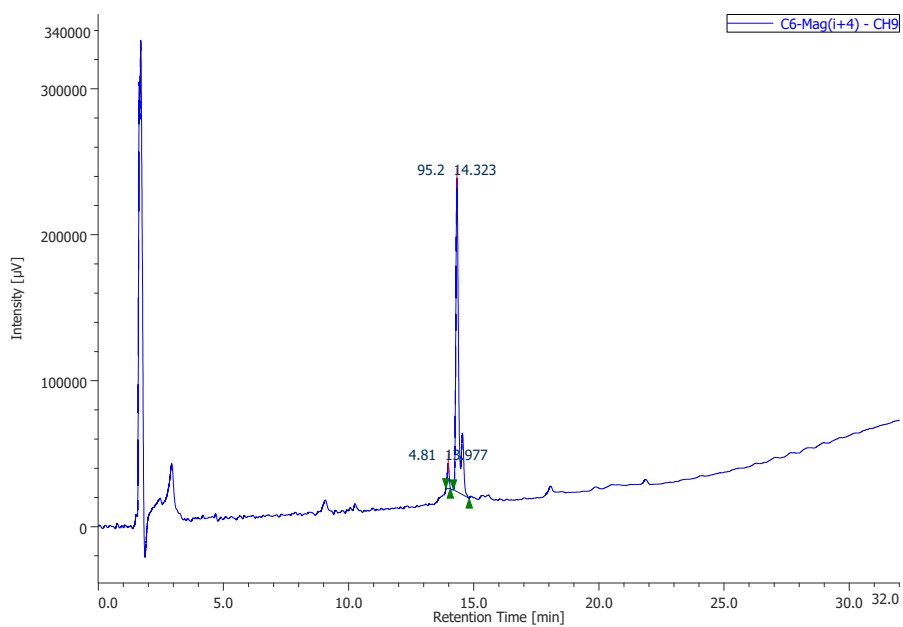

## C12-2

$\text{CH}_3(\text{CH}_2)_{10}\text{CO-S}_5\text{-Ile-Lys-Lys-S}_5\text{-Leu-Lys-Ser-Ala-Lys-Lys-Phe-Val-Lys-Ala-Phe-Lys-NH}_2$

HPLC: Conditions = solvent A 0.1% TFA/water, solvent B 0.1% TFA/ $\text{CH}_3\text{CN}$

Gradient = 10-90% gradient of solvent B over 30 min

Purity: 98.1%

HRMS (ESI<sup>+</sup>) calcd for  $\text{C}_{112}\text{H}_{195}\text{N}_{25}\text{O}_{19}$   $[\text{M}+4\text{H}]^{4+}$ : 549.6343; found: 549.6267

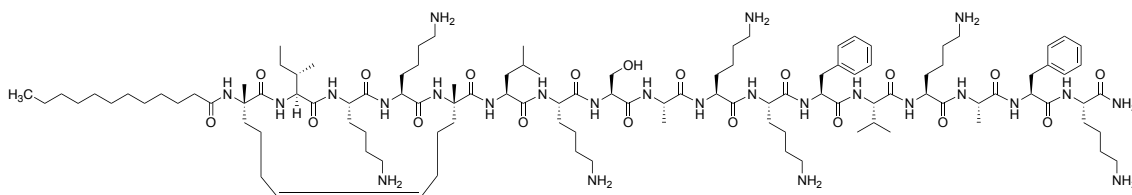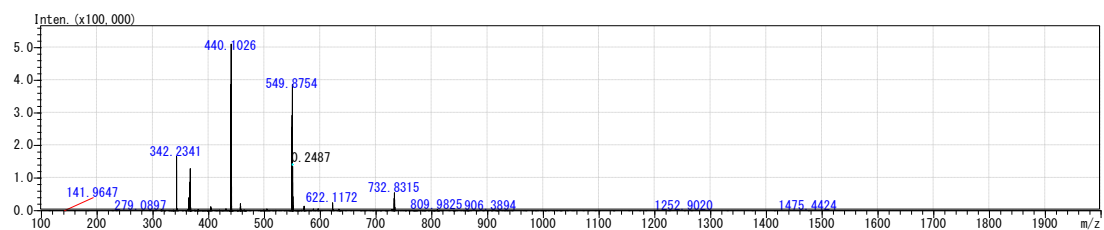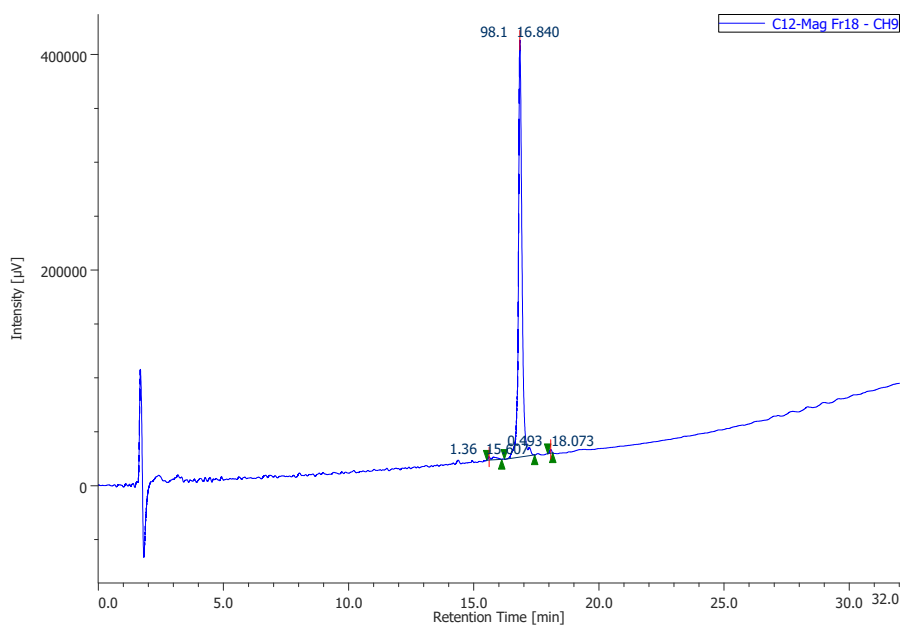

**C18-2** (E/Z isomers were detected)

$\text{CH}_3(\text{CH}_2)_{16}\text{CO-S}_5\text{-Ile-Lys-Lys-S}_5\text{-Leu-Lys-Ser-Ala-Lys-Lys-Phe-Val-Lys-Ala-Phe-Lys-NH}_2$

HPLC: Conditions = solvent A 0.1% TFA/water, solvent B 0.1% TFA/ $\text{CH}_3\text{CN}$

Gradient = 10-90% gradient of solvent B over 30 min

Purity: 96.2%

HRMS (ESI<sup>+</sup>) calcd for  $\text{C}_{118}\text{H}_{207}\text{N}_{25}\text{O}_{19}$   $[\text{M}+5\text{H}]^{5+}$ : 456.7278; found: 456.7152

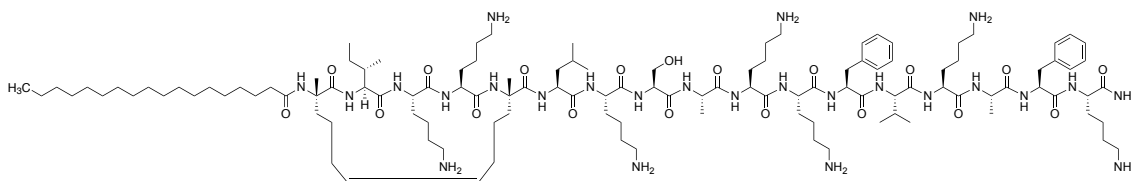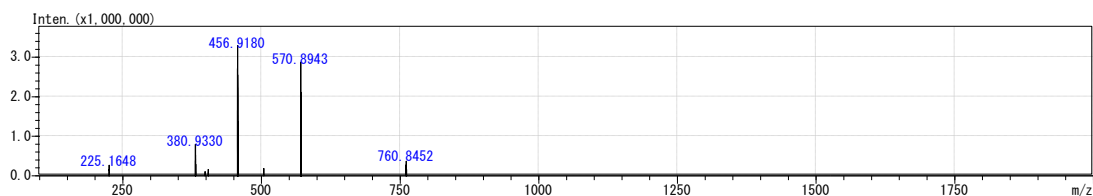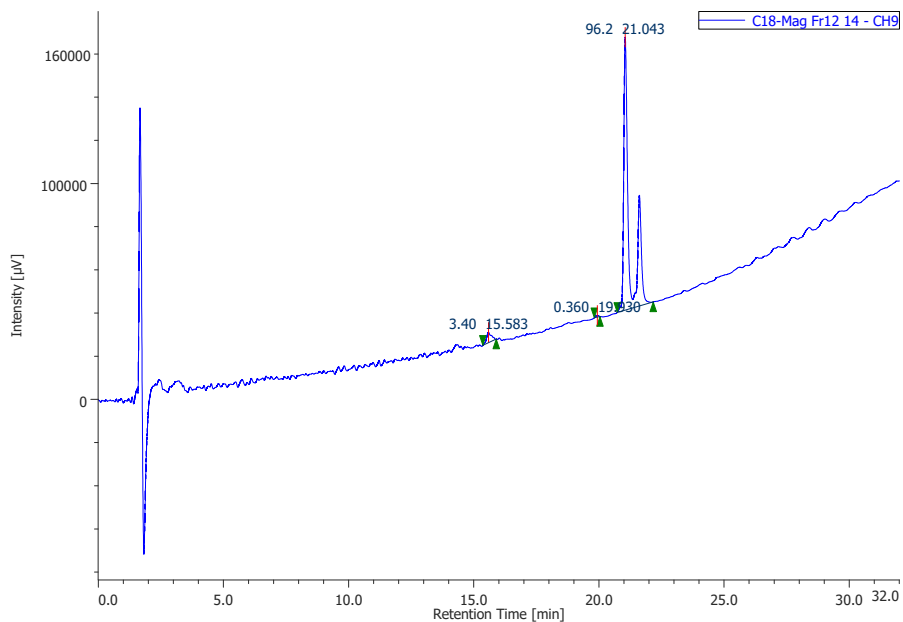



**Table S1** The pore forming score for antimicrobial activities of peptides 1, 2, and 8 in DOPE/DOPG membrane.

| Peptide                             | 1           | 2           | 8          |
|-------------------------------------|-------------|-------------|------------|
| Pore stability (%)                  | 48          | 49          | 38         |
| Pore diameter (nm)                  | 1.1 ± 0.01  | 1.2 ± 0.6   | 0.5 ± 0.01 |
| Charge flux (pC sec <sup>-1</sup> ) | 32.5 ± 10.3 | 68.1 ± 13.6 | 42.9 ± 8.6 |
| Pore forming activity               | 2.5         | 1.1         | 0.4        |

**Table S2** The pore forming score for antimicrobial activities of peptides 1, 2, and 8 in DOPC membrane.

| Peptide                             | 1          | 2          | 8           |
|-------------------------------------|------------|------------|-------------|
| Pore stability (%)                  | 47         | 53         | 60          |
| Pore diameter (nm)                  | N/A        | 1.2 ± 0.3  | 1.7 ± 0.4   |
| Charge flux (pC sec <sup>-1</sup> ) | 25.3 ± 8.5 | 21.0 ± 8.4 | 92.1 ± 16.0 |
| Pore forming activity               | 0.4        | 1.1        | 0.9         |
